# Supplementary material
Source: PubMed Central journal article supplement (PMC4087144)
Supplement: NIHMS561765-supplement-1.pdf [file NIHMS561765-supplement-1.pdf]

# **Oncogenic transformation of diverse gastrointestinal tissues in primary organoid culture**

Xingnan Li, Lincoln Nadauld, Akifumi Ootani, David C. Corney, Reetesh K. Pai, Olivier Gevaert, Michael A. Cantrell, Paul G. Rack, James T. Neal, Carol W-M. Chan, Trevor Yeung, Xue Gong, Jenny Yuan, Julie Wilhelmy, Sylvie Robine, Laura D. Attardi, Sylvia K. Plevritis, Kenneth E. Hung, Chang-Zheng Chen, Hanlee P. Ji, Calvin J. Kuo

## **Supplementary Information**

Including

Supplementary Figures 1-11

Supplementary Discussion

# Supplementary Figure 1

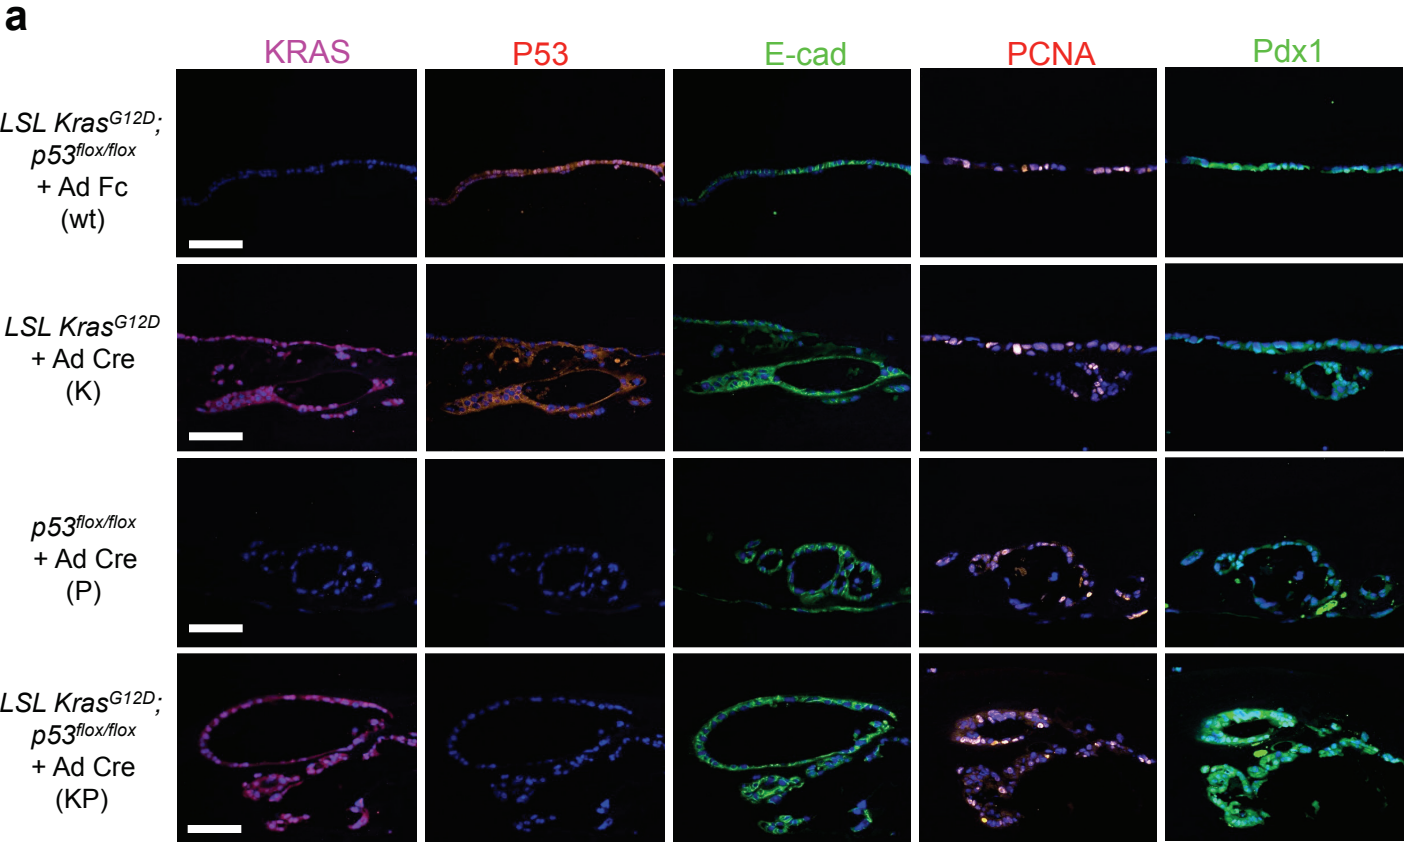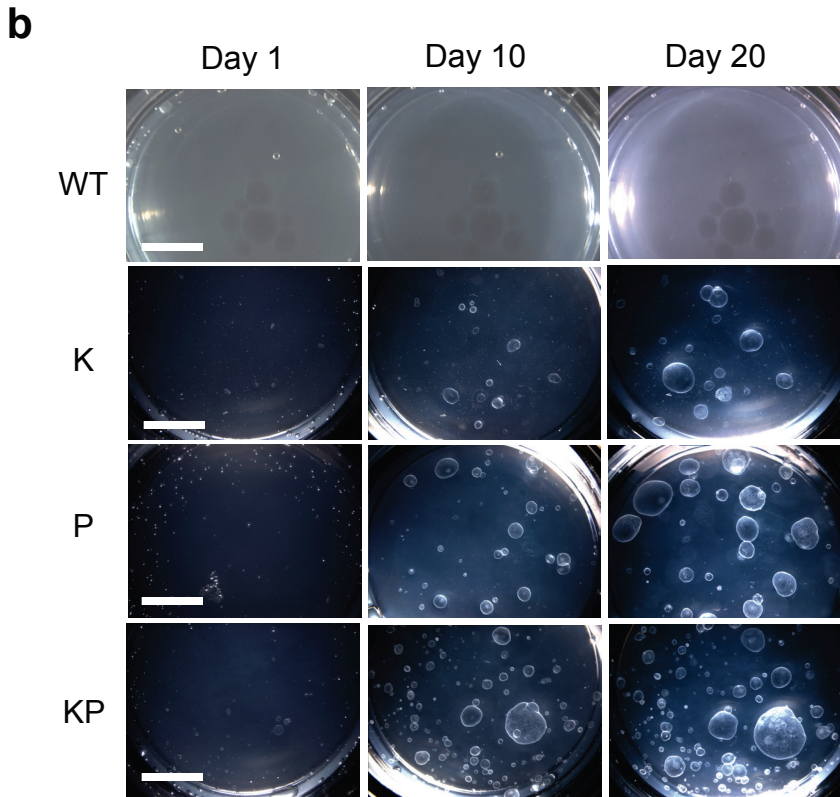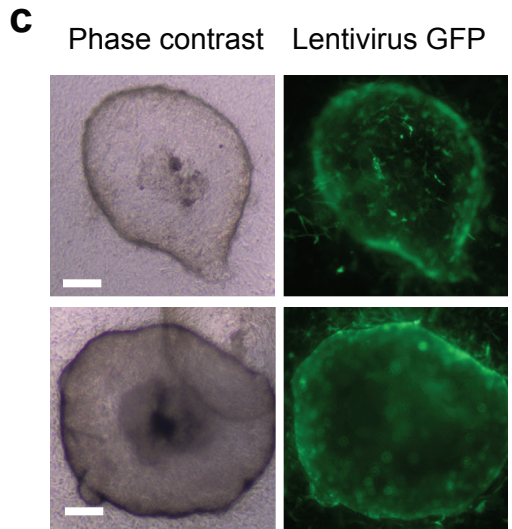

**Supplementary Figure 1. Confirmation of loxP-Cre manipulation and epithelial dysplasia in LSL *Kras*<sup>G12D</sup>; *p53*<sup>flox/flox</sup> neonatal pancreatic organoids .**

**(a)** *Kras*<sup>G12D</sup> expression (*Kras*) and/or *p53* deletion (*p53*) were confirmed by anti-*Kras* and/or anti-*p53* immunofluorescence. Anti-E-cadherin (E-cadherin) immunofluorescence outlined the epithelial layer of dysplastic regions. Anti-PCNA (PCNA) immunofluorescence indicated hyperproliferative cells. Anti-Pdx1 immunofluorescence documented ductal cells in pancreatic organoids. Culture day 30, scale bars, 100  $\mu$ m.

**(b)** Efficient passage of primary pancreatic organoids. Pancreatic organoid cultures were generated from neonatal mice harboring homozygous *Trp53* floxed (P) and/or *LSL Kras*<sup>G12D</sup> (K) alleles or both (KP) and subsequently infected with CreGFP-expressing adenovirus. On day 20, the organoids were dissociated and replated in a collagen matrix with air-liquid interface. Pictures were taken at day 1, 10 and 20 post-passage. scale bars, 5 mm.

**(c)** Efficient viral infection of passaged primary pancreatic organoids. Pancreatic organoid cultures were generated from the pancreas of neonatal mice harboring *Trp53* floxed (P) alleles (*p53*<sup>flox/flox</sup>). At day 20, organoids underwent secondary passage and simultaneous infection with GFP-expressing lentivirus or retrovirus. Phase contrast (left) and GFP expressing (right) organoids were imaged after 7 additional days post-infection. scale bar, 200  $\mu$ m.

## Supplementary Figure 2

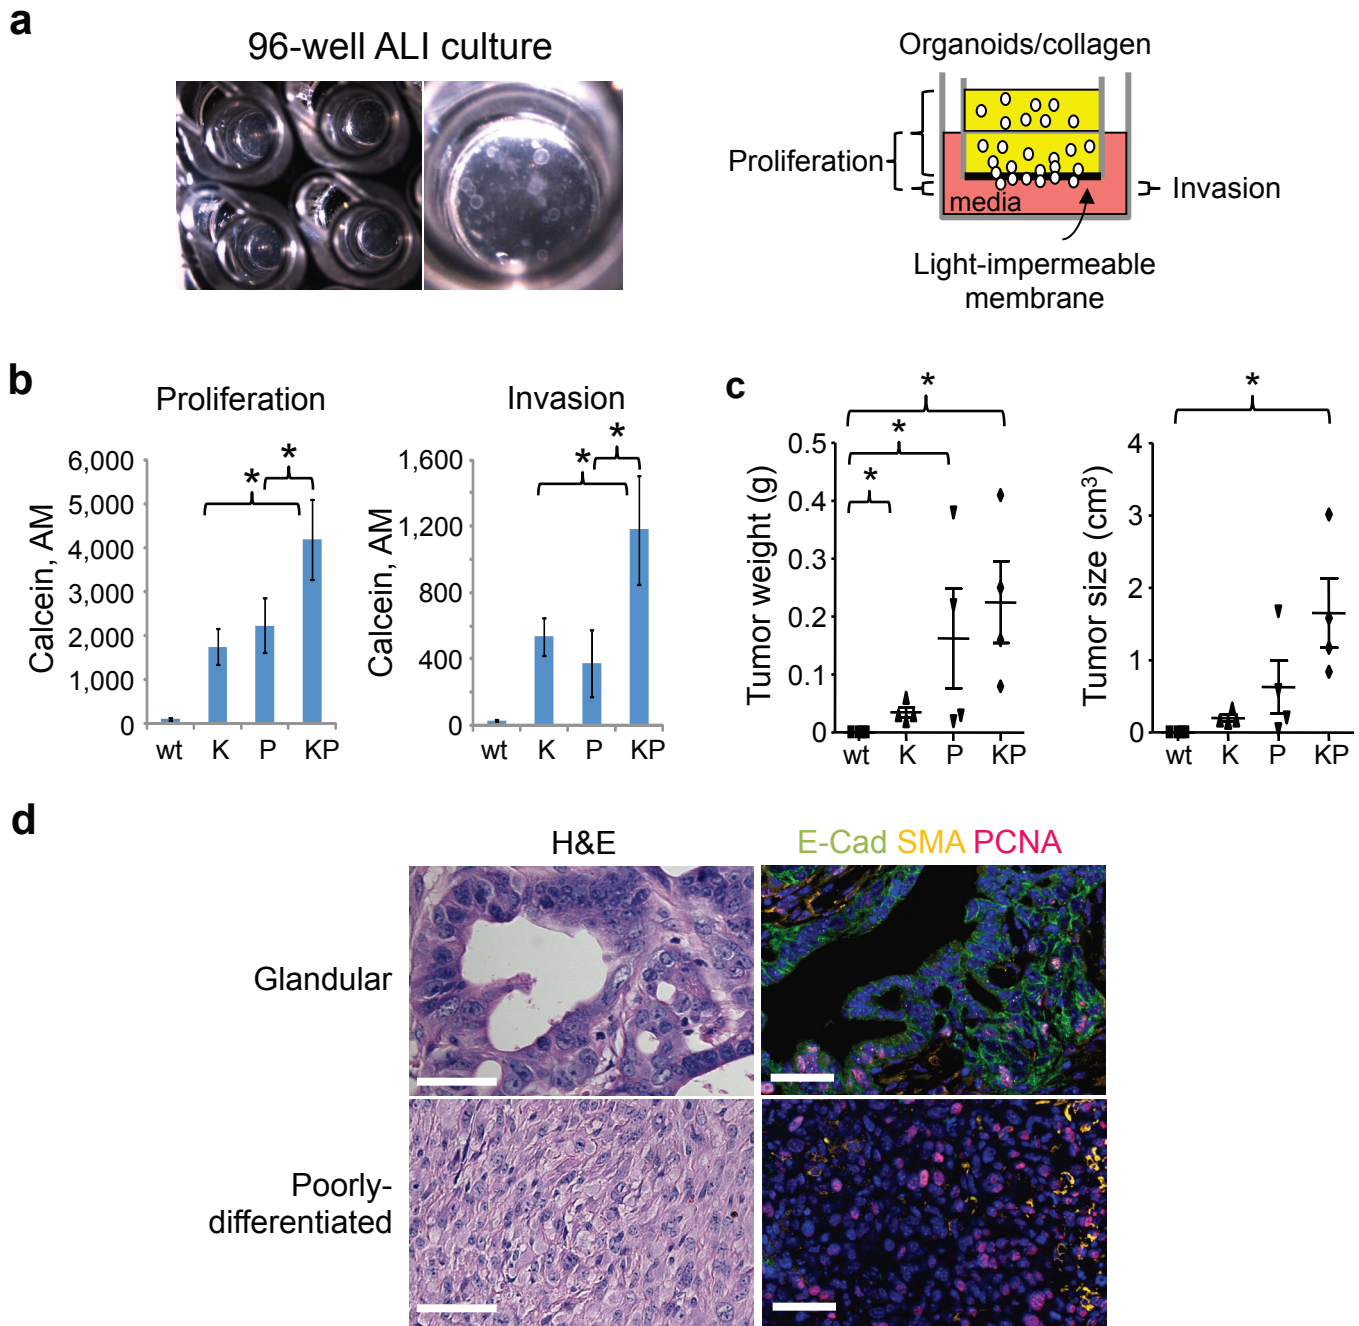

### Supplementary Figure 2. *In vitro* evaluation of pancreatic organoid proliferation and invasion and *in vivo* evaluation of organoid-derived pancreatic tumors.

(a) 96-well organoid proliferation/invasion assay. Schematic of organoid growth in 96-well ALI culture, d14 after secondary plating with enlargement of a single well, demonstrating robust formation of secondary organoids. A light-impermeable transwell membrane allows tandem determination of proliferation vs. invasion.

(b) FACS-sorted EpCAM<sup>+</sup> disaggregated cells from day 14 organoids of the indicated genotypes were replated at 10,000 cells/well into 96-well ALI culture to form secondary organoids. Wild-type organoids did not passage but after 14 days of additional culture, proliferation and invasion in WT, K, P and KP organoids was determined by Calcein Red-Orange, AM fluorescence signal. n=12 wells/genotype, mean $\pm$ SE. \* = P < 0.05 for KP vs. K or P.

(c) Pancreatic tumor weight and size, day 30 after s.c. implantation of dissociated organoids of the indicated genotypes into NOD.Cg-Prkd<sup>cscid</sup> Il2rg<sup>tm1Sug/JicTac</sup> mice, n=4 tumors/genotype. \* = P < 0.05.

(d) E-cadherin loss in poorly-differentiated areas of organoid-derived pancreatic tumors. H&E and immunofluorescence of glandular versus non-glandular areas of a KP tumor is depicted, d30 after organoid implantation. Scale bars, 50 $\mu$ m.

# Supplementary Figure 3

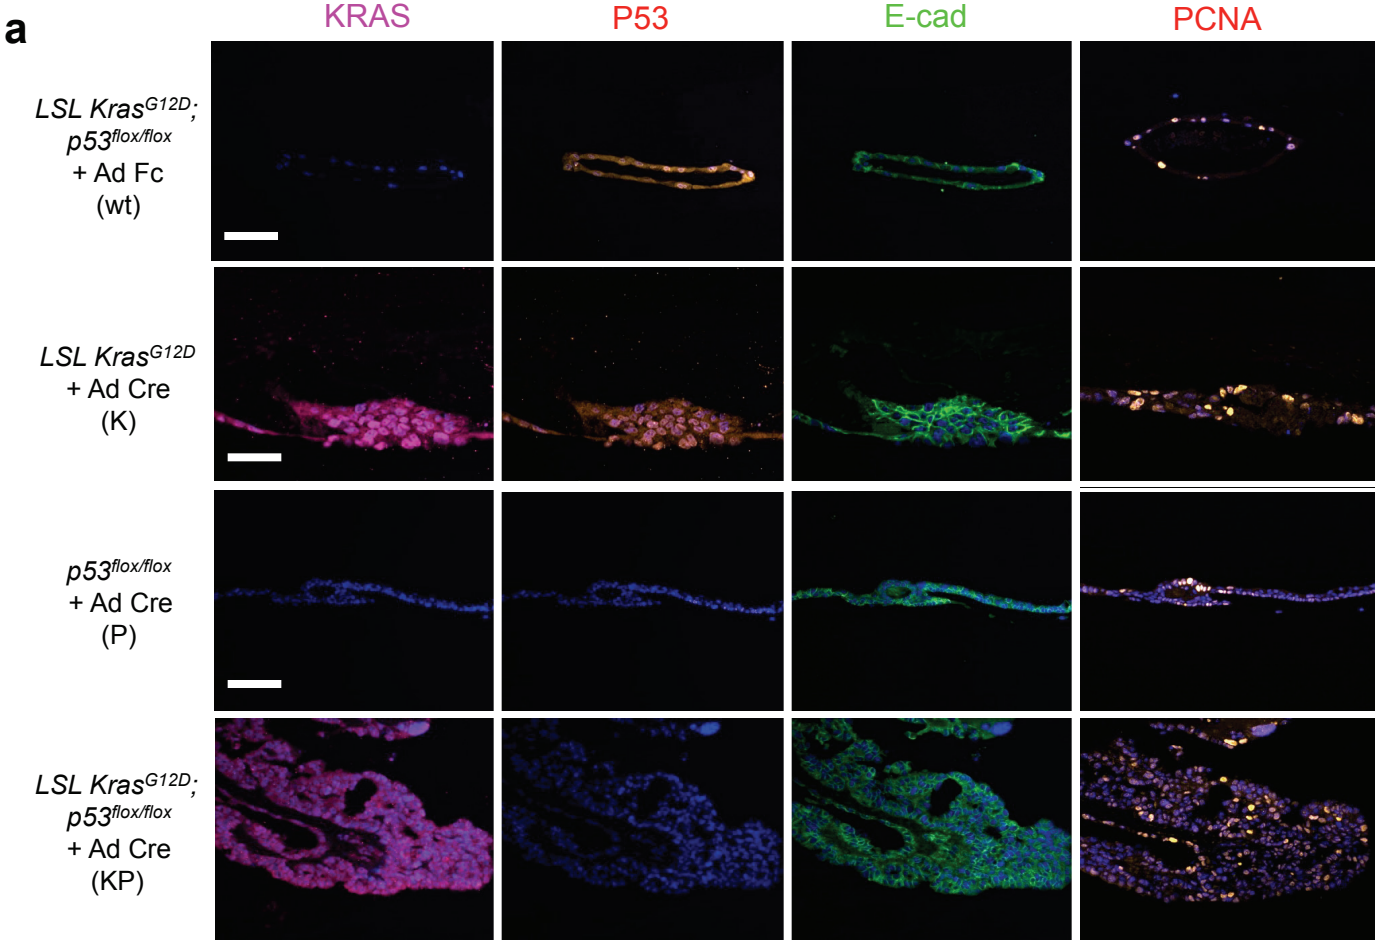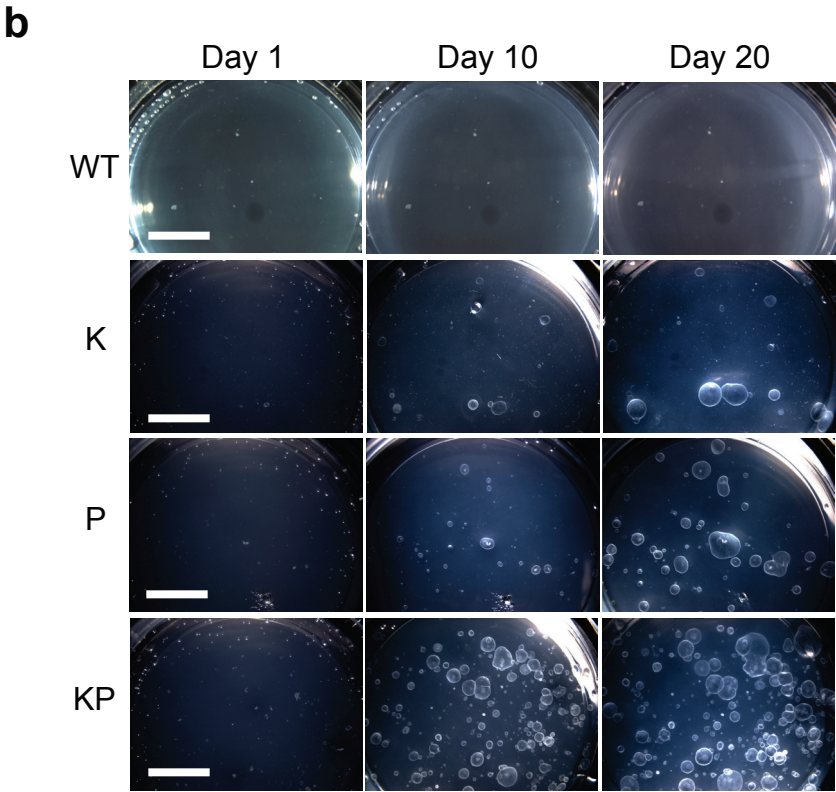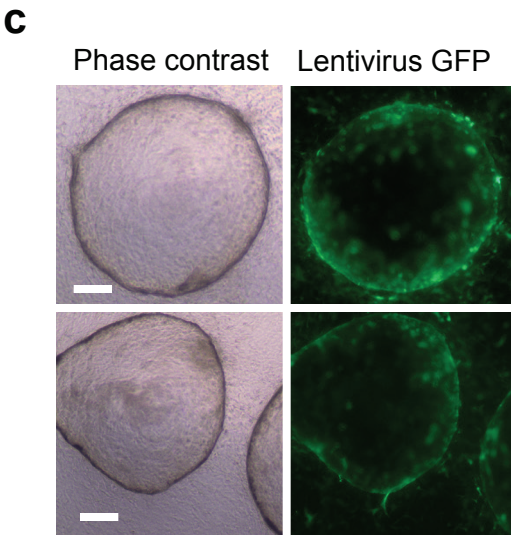

**Supplementary Figure 3. Confirmation of loxP-Cre manipulation and epithelial dysplasia in LSL *Kras*<sup>G12D</sup>; p53<sup>flox/flox</sup> gastric organoids.**

**(a)** *Kras*<sup>G12D</sup> expression (*Kras*) and/or p53 deletion (p53) were confirmed by anti-*Kras* and/or anti-p53 immunofluorescence staining. Anti-E-cadherin (E-cadherin) immunofluorescence staining confirmed the epithelial nature of dysplastic regions. Anti-PCNA immunofluorescence staining indicated hyperproliferative cells. Culture d30, scale bars, 100  $\mu$ m.

**(b)** Gastric organoid cultures were made from the stomach of neonatal mice harboring *Trp53* floxed (P) (p53<sup>flox/flox</sup>) and/or *LSL Kras*<sup>G12D</sup> (K) alleles and subsequently infected with CreGFP-expressing adenovirus. On day 20, the organoids were dissociated and replated in a collagen matrix with air-liquid interface. Pictures were taken at day 1, 10 and 20 post-passage. scale bars, 5 mm.

**(c)** Gastric organoid cultures were generated from the stomach of neonatal mice harboring *Trp53* floxed (P) alleles (p53<sup>flox/flox</sup>). At day 20, organoids underwent secondary passage and simultaneous infection with GFP-expressing lentivirus or retrovirus. Phase contrast (left) and GFP expressing (right) organoids were imaged after 7 additional days post-infection. scale bars, 200  $\mu$ m.

## Supplementary Figure 4

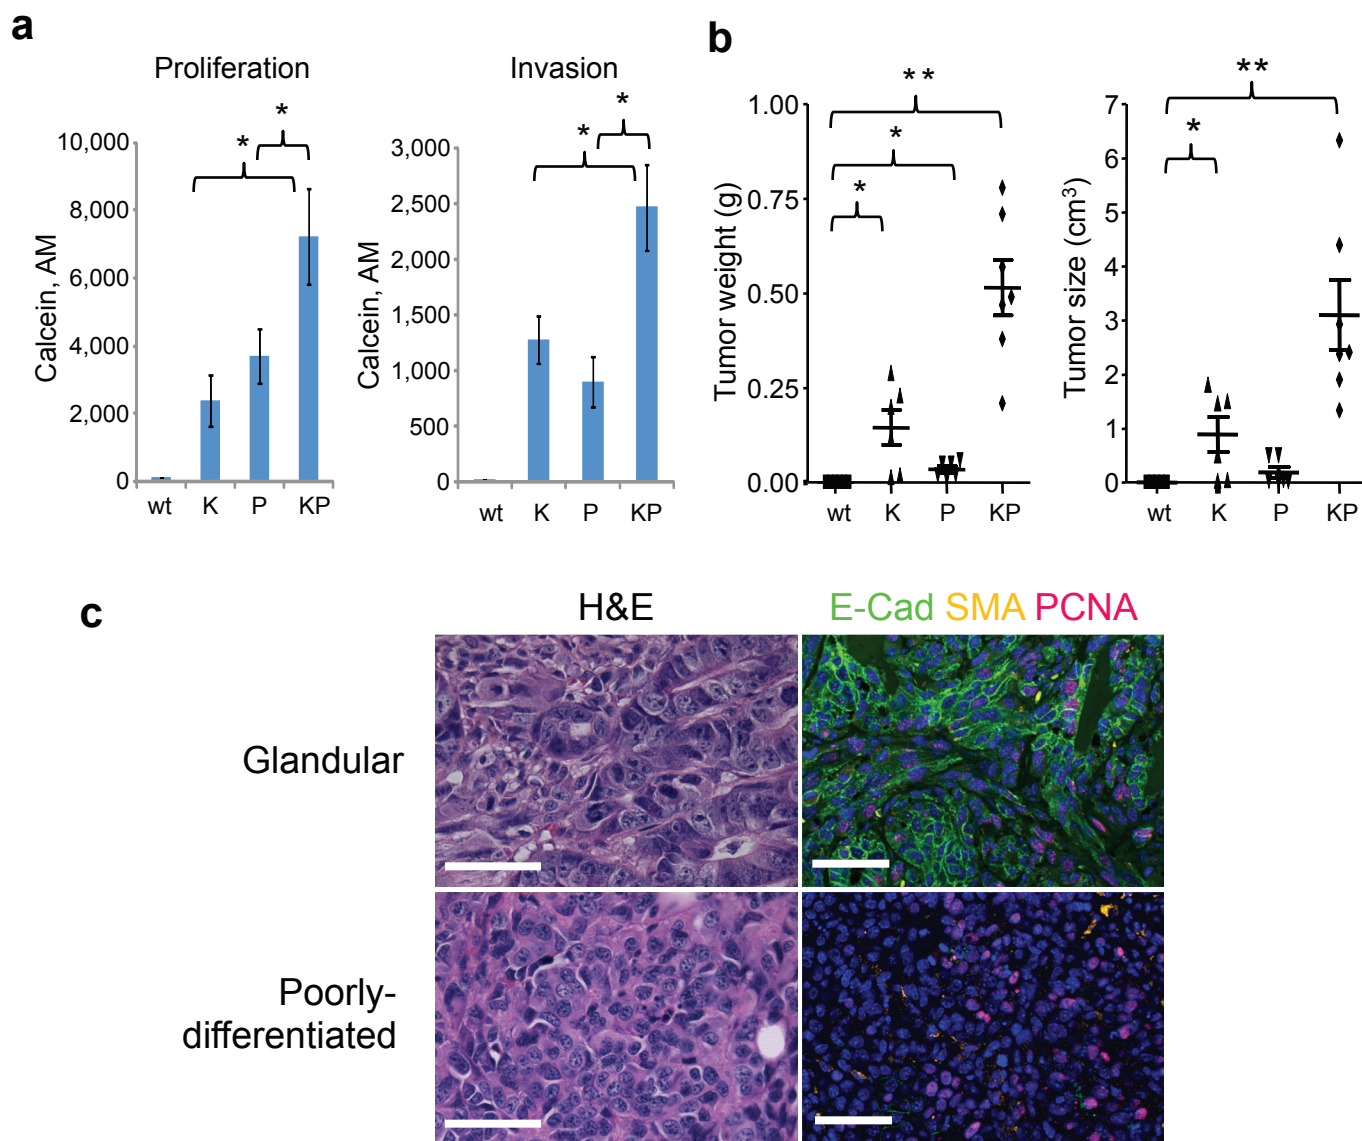

### Supplementary Figure 4. 96-well gastric organoid proliferation and invasion assay.

**(a)** FACS-sorted EpCAM<sup>+</sup> disaggregated cells from day 14 organoids of the indicated genotypes were replated at 10,000 cells/well into 96-well air-liquid interface culture to form secondary organoids. Wild-type organoids did not passage but after 14 days of additional culture, proliferation and invasion in WT, K, P and KP organoids was determined by Calcein Red-Orange, AM fluorescence signal. n=12 wells/genotype, mean±SE. \* = P < 0.05 for KP vs. K or P.

**(b)** Tumor weight (left) and size (right), day 30 after s.c. implantation of dissociated organoids of the indicated genotypes into NOD.Cg-Prkd<sup>csid</sup> Il2rg<sup>tm1Sug/JicTac</sup> mice, n ≥ 6 tumors/genotype. \*\* = P < 0.003, \* = P < 0.05.

**(c)** H&E and immunofluorescence of glandular versus non-glandular areas of a KP tumor is depicted, d30 after organoid implantation. Scale bar, 50 μm.

## Supplementary Figure 5

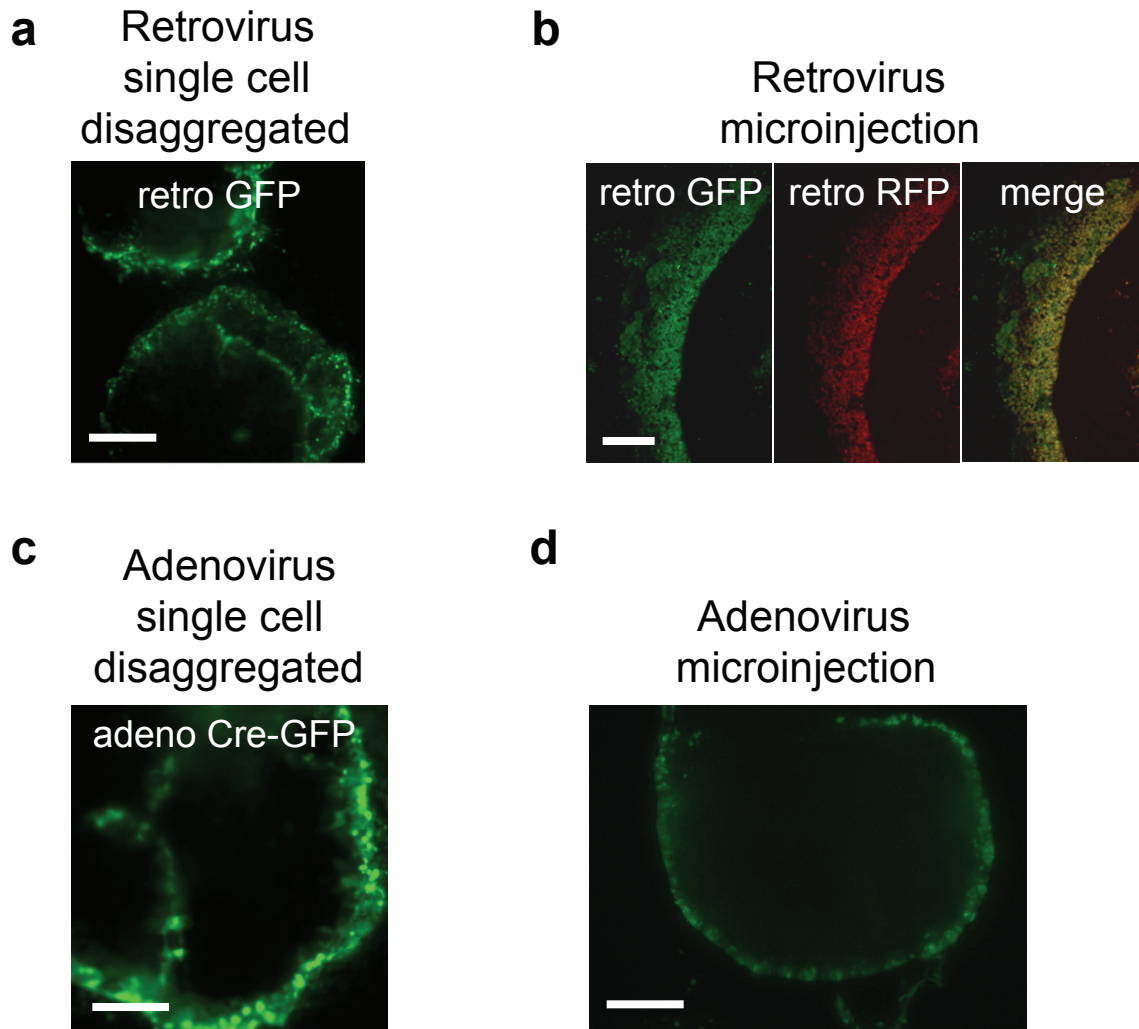

### Supplementary Figure 5. Robust viral transduction of primary intestinal organoids by various methods.

**(a)** Retrovirus GFP transduction (LMP) by infection of disaggregated single-cell suspensions of *Apc*-null cells from tamoxifen-treated *Apc<sup>flox/flox</sup>; villin-CreER* organoids. Live cell inverted fluorescence microscopy is depicted d14 after infection.

**(b)** Alternative method of retrovirus transduction (LMP) by microinjection of virus into the lumen of intact *Apc*-null intestinal organoids, d10 after infection. Robust coinfection of retrovirus GFP and RFP is shown by fluorescence microscopy of intrinsic GFP/RFP after whole mount fixation and embedding.

**(c, d)**. Adenoviral infection of freshly disaggregated *Apc*-null organoids followed by secondary organoid formation (c) versus microinjection of adenovirus into the lumen of pre-formed organoids (d). d14 after infection is depicted.

All scale bars are 100  $\mu$ m.



## Supplementary Figure 6

*Apc*-null ("A") d50

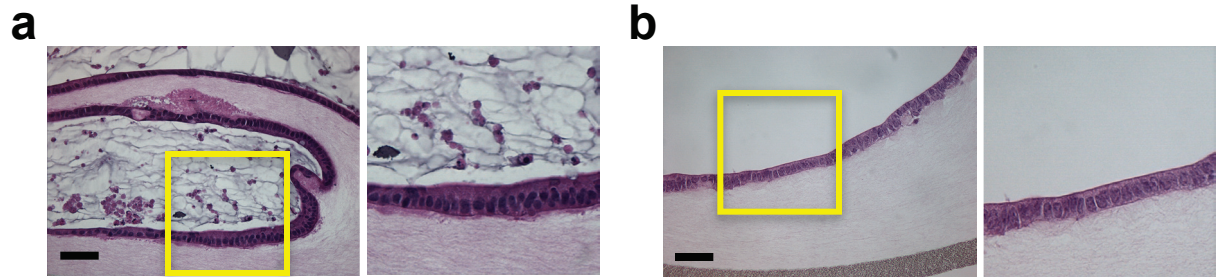

AKPS colon organoids d50

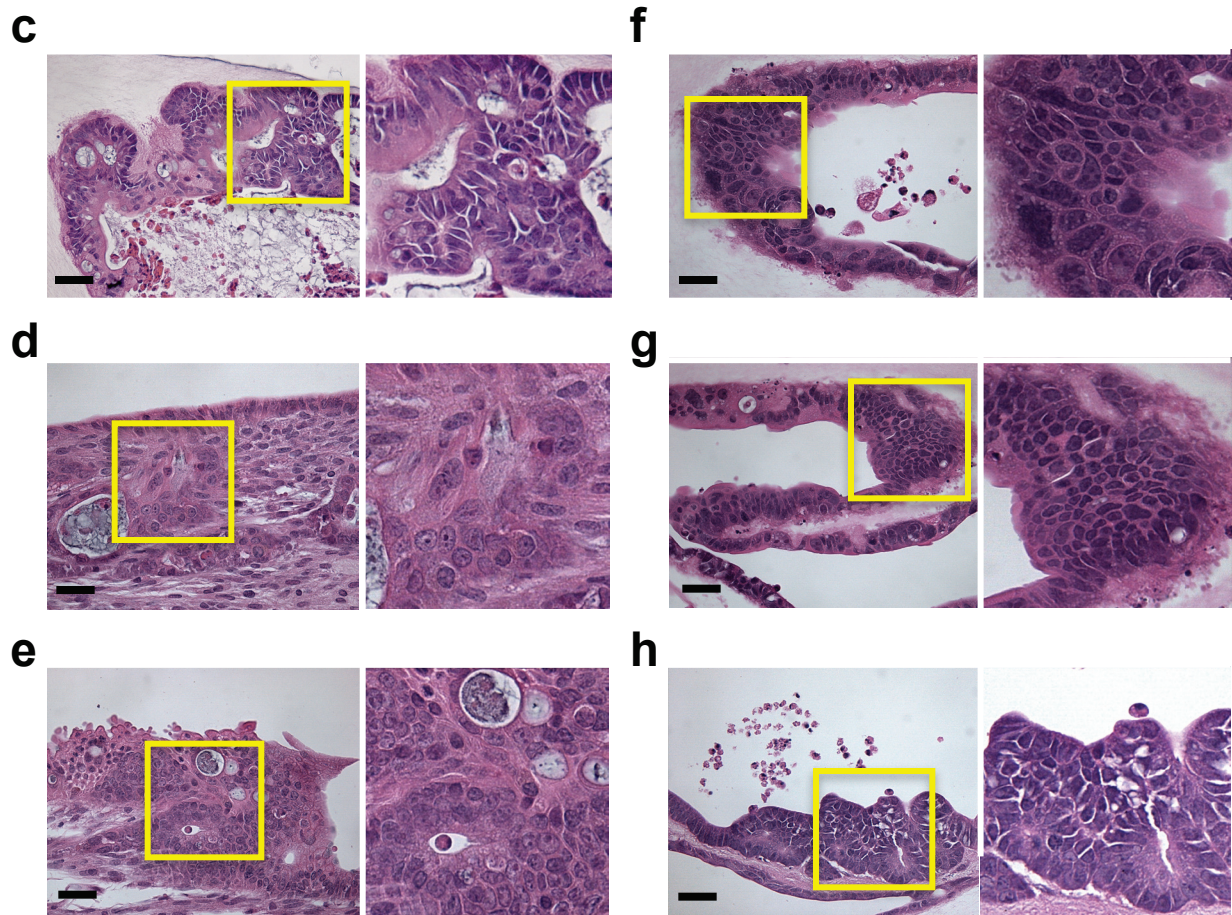

### Supplementary Figure 6. Additional views of *Apc*-null ("A") versus AKPS colon organoids.

(a, b). *Apc*-null 1-gene organoids reproduced for comparison from **Figure 3**.

(c-h) AKPS 4-gene colon organoids. All images are culture day 50 after retroviral infection.

(c-e) represent additional views of AKPS organoids from **Figure 3e**.

(f-h) represent additional examples of AKPS colon organoids. The yellow boxes are further enlarged in the adjacent panels. Note marked nuclear atypia, pleiomorphism and prominent nucleoli in AKPS but not *Apc*-null organoids. (d, e) represent adenocarcinoma with invasion. High grade dysplasia is present in c, f and g, with moderate dysplasia in h.

All scale bars are 50  $\mu$ m.

# Supplementary Figure 7

## Oncogenic transformation of small intestinal organoids

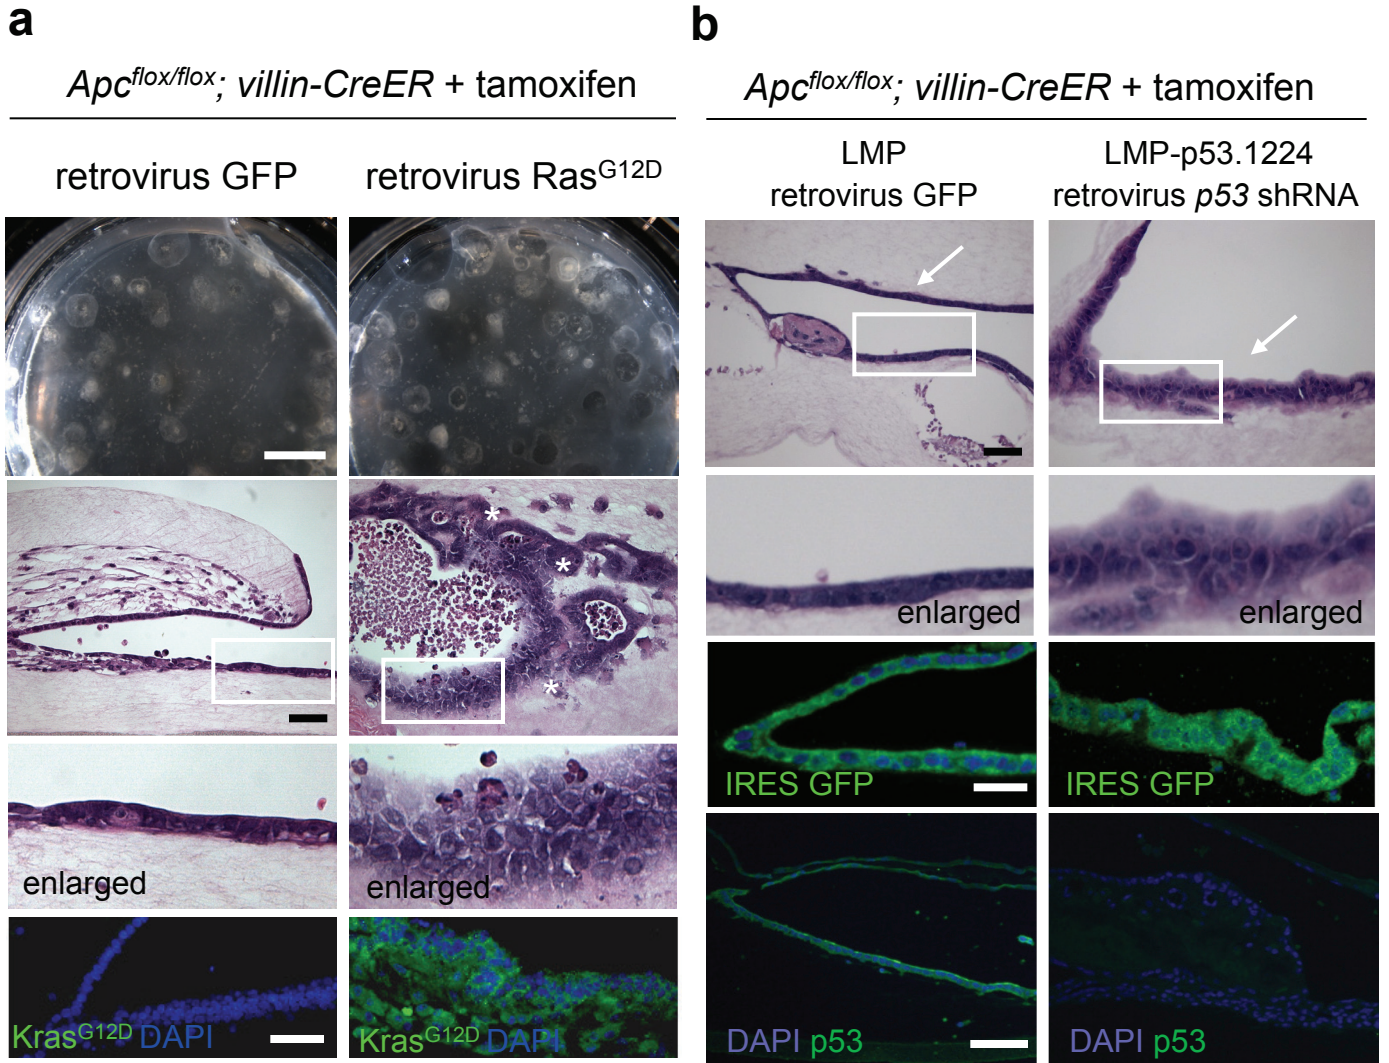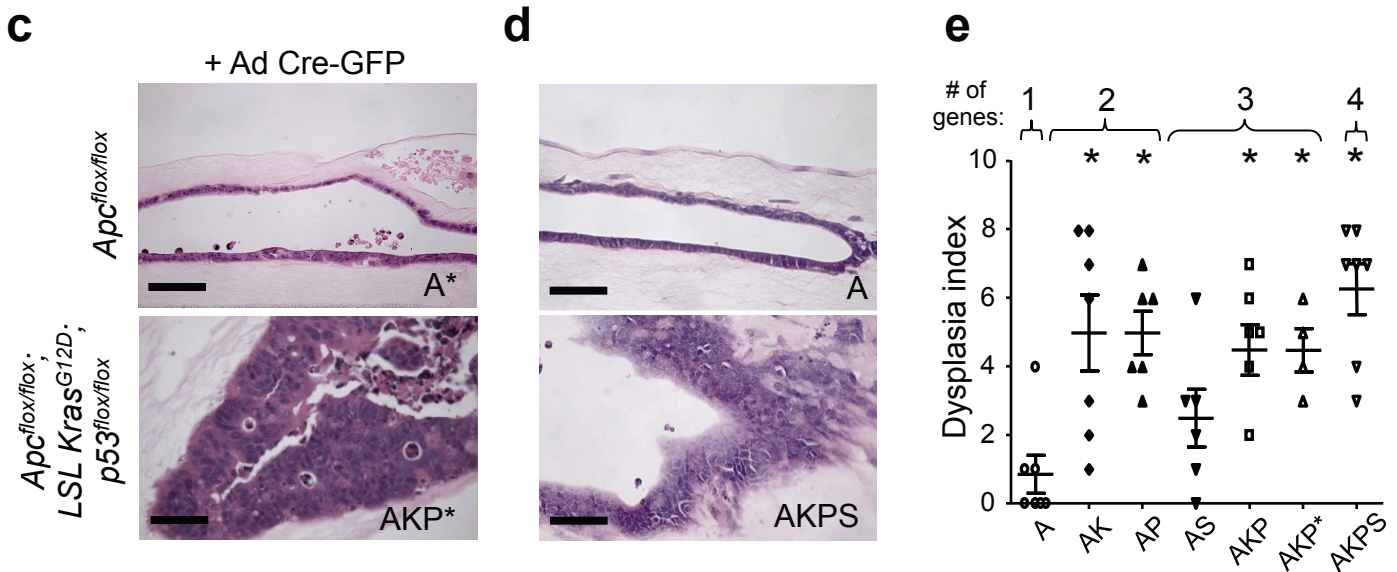

**Supplementary Figure 7. Systematic evaluation of oncogene modules of increasing complexity in primary small organoids.**

**(a)** Primary small intestinal organoids from adult *Apc<sup>flox/flox</sup>; villin-CreER* mice were treated with tamoxifen to effect Apc deletion, followed by infection with retrovirus *Kras<sup>G12D</sup>* (pBabe-puro *Kras<sup>G12D</sup>*) or LMP-p53.1224 retrovirus (*p53* shRNA IRES GFP) or control retrovirus GFP (LMP) and culture for an additional 20 days.

**top**, *Kras<sup>G12D</sup>* did not induce gross differences in growth of Apc-null organoids. Light stereomicroscope images are shown. Scale bar, 5 mm.

**Middle**, retrovirus *Kras<sup>G12D</sup>* infection induced marked morphologic dysplasia with nuclear pleiomorphism and atypia, as well as a stratified epithelial layer. \*= areas of robust invasion into the surrounding collagen. Scale bar, 50  $\mu$ m.

**Bottom**, Anti-Kras IF. Endogenous Kras expression is low and the signal in h. predominantly represents *Kras<sup>G12D</sup>*. Scale bar, 50  $\mu$ m.

**(b)** Primary small intestinal organoids from adult *Apc<sup>flox/flox</sup>; villin-CreER* mice were treated with tamoxifen to effect Apc deletion, followed by infection with retrovirus *Kras<sup>G12D</sup>* (pBabe-puro *Kras<sup>G12D</sup>*) or LMP-p53.1224 retrovirus (*p53* shRNA IRES GFP) or control retrovirus GFP (LMP) and culture for an additional 20 days (conditions identical to a, above)

**Top**, *p53* shRNA elicits high grade dysplasia with nuclear pleiomorphism, atypia, and stratification H&E staining, scale bar, 50  $\mu$ m.

**Middle**, Anti-GFP immunofluorescence signal indicates robust infection from the IRES GFP cassette present in both the control and *p53* shRNA retroviruses, scale bar, 50  $\mu$ m.

**Bottom**, Anti-p53 immunofluorescence indicates *p53* knockdown, scale bar, 100  $\mu$ m.

**(c)** Explanted tissue from *Apc<sup>flox/flox</sup>; LSL Kras<sup>G12D</sup>; p53<sup>flox/flox</sup>* adult mice or *Apc<sup>flox/flox</sup>* control mice was infected with Ad Cre-GFP at the time of plating. Organoid growth proceeded for 50 days followed by H&E staining of paraffin-embedded sections. High grade dysplasia and marked proliferation is observed in the 3-gene *Apc/Kras/p53* oncogene module (AKP\*) versus the 1-gene *Apc* (A\*) control. The “\*” designation indicates that the AKP mutations were purely encoded by floxed mouse alleles and retroviral infection was not used. Scale bar, 50  $\mu$ m.

**(d)** 4-gene module AKPS induced invasive adenocarcinoma histology in small intestine organoids. H&E, day 20. ) Primary small intestinal organoids from adult *Apc<sup>flox/flox</sup>; villin-CreER* mice were treated with tamoxifen to effect Apc deletion, followed by infection with retrovirus *Kras<sup>G12D</sup>* (pBabe-puro *Kras<sup>G12D</sup>*), LMP-p53.1224 retrovirus (*p53* shRNA IRES GFP) and retrovirus Smad4 shRNA (AKPS module) or control retrovirus GFP alone (A module). Scale bar, 50  $\mu$ m.

**(e)** Dysplasia index for small intestine organoids, analyzed at day 20 post-retroviral infection, except for AKP\* (day 50 post-Ad Cre-GFP). Each individual data point represents n=4-6 microscopic fields containing viable organoids. Mean +/- SE. \* = P < 0.01 versus A.

## Supplementary Figure 8

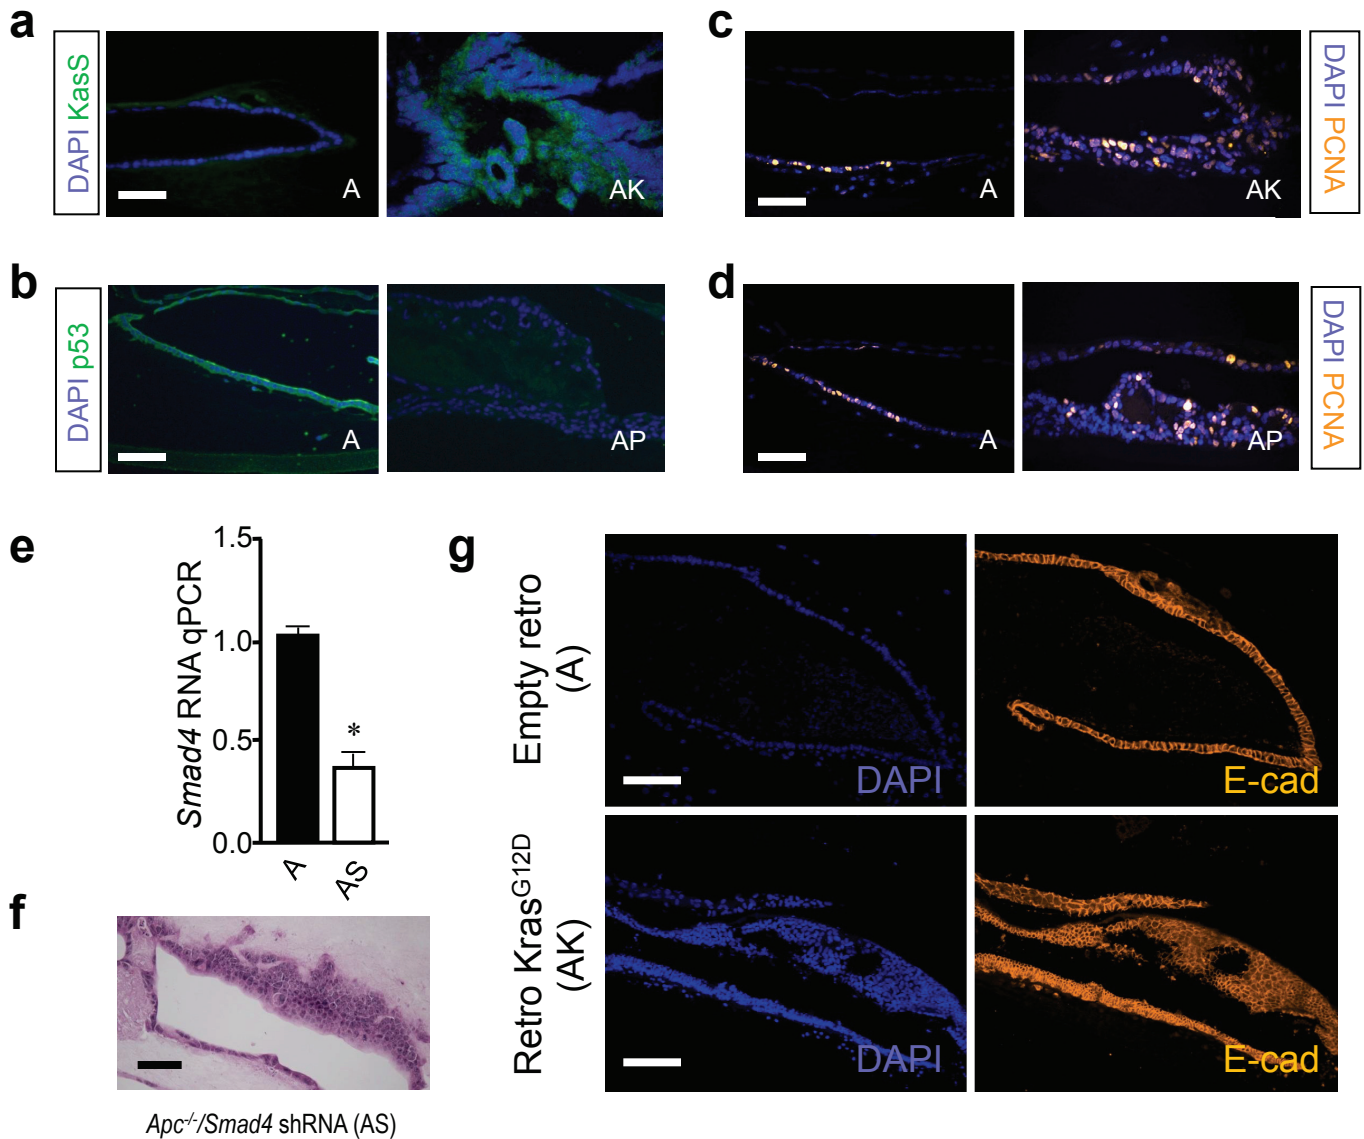

### Supplementary Figure 8. Confirmation of oncogene manipulation and epithelial dysplasia in *Apc*-null small intestinal organoids.

**(a, b).** **(a)** *Kras*<sup>G12D</sup> overexpression and **(b)** p53 knockdown confirmed by anti-Kras or anti-p53 immunofluorescence, d 20.

**(c, d).** PCNA staining of small intestinal organoids with and without *Kras*<sup>G12D</sup> overexpression **(c)** or *p53* shRNA knockdown **(d)**.

**(e)** *Smad4* knockdown documented by qRT-PCR of FACS-sorted EpCAM<sup>+</sup> GFP<sup>+</sup> epithelium from tamoxifen-treated *Apc*<sup>flox/flox</sup>; *villin-CreER* small intestine organoids infected with retrovirus *Smad4* shRNA/GFP (LMP backbone, AS) or LMP alone (A). n=3, Mean +/- SE. \* = P < 0.05.

**(f)** H&E, d20 from *Smad4* knockdown as in **(e)**.

**(g)** Anti-E-cadherin immunofluorescence confirms epithelial dysplasia in tamoxifen-treated small intestine *Apc*<sup>flox/flox</sup>; *villin-CreER* organoids infected with retro *KRAS*<sup>G12D</sup> (AK) or control retro (A).

# Supplementary Figure 9

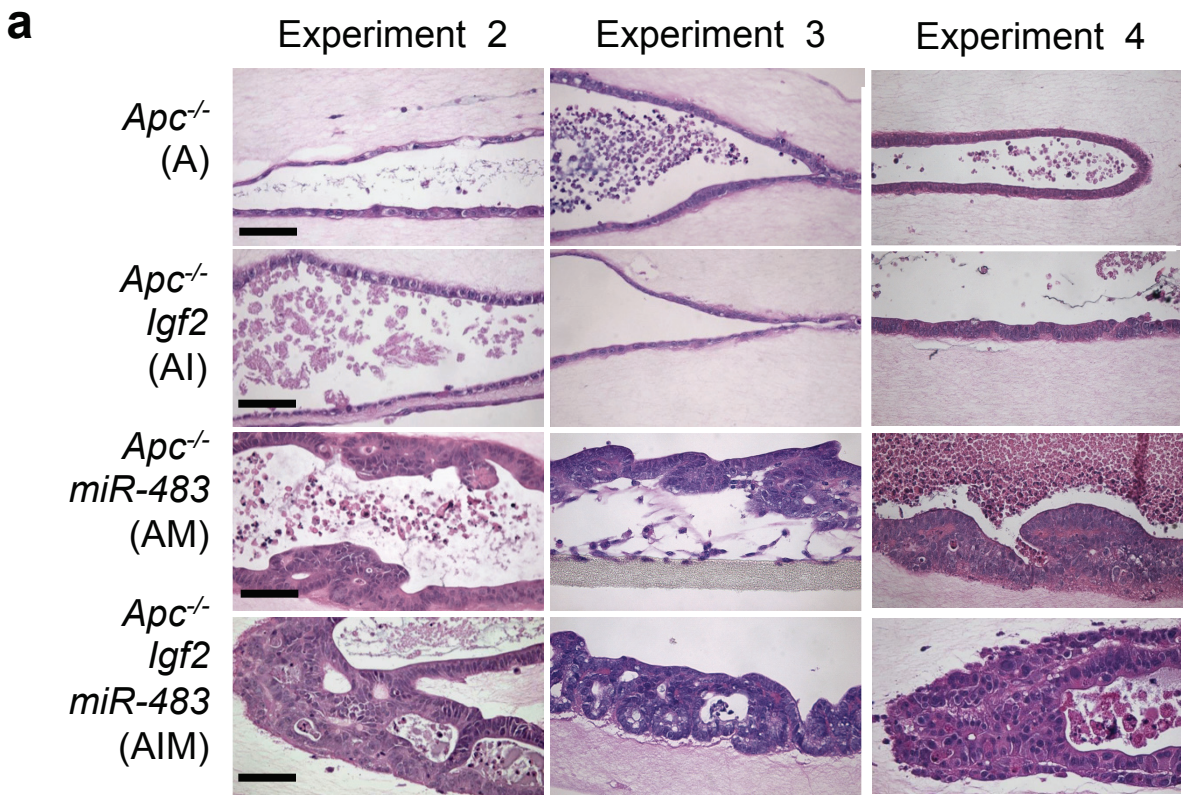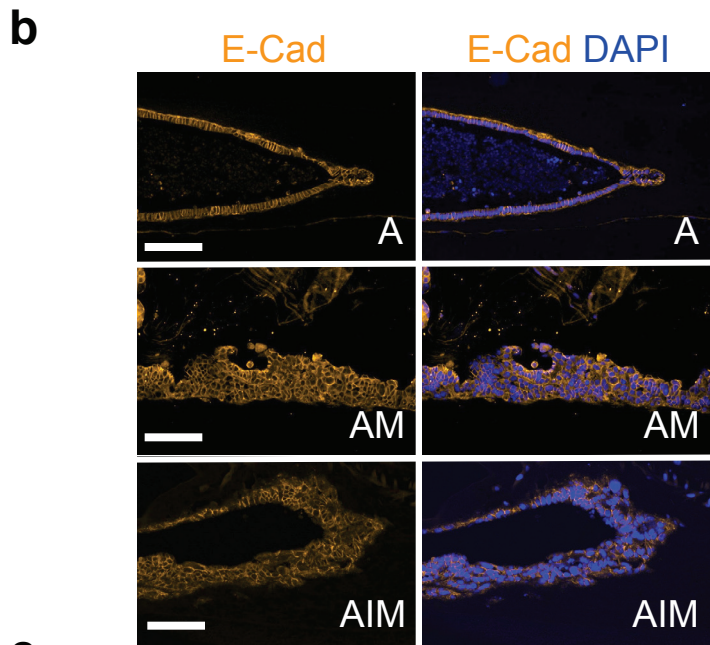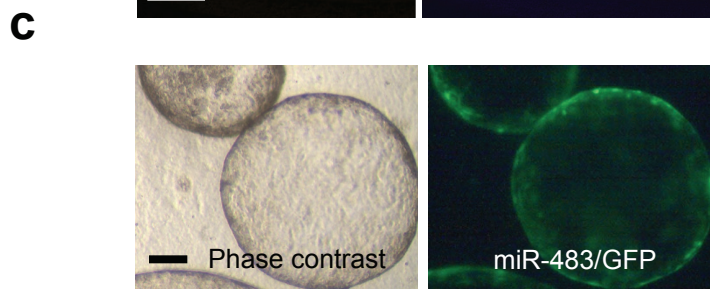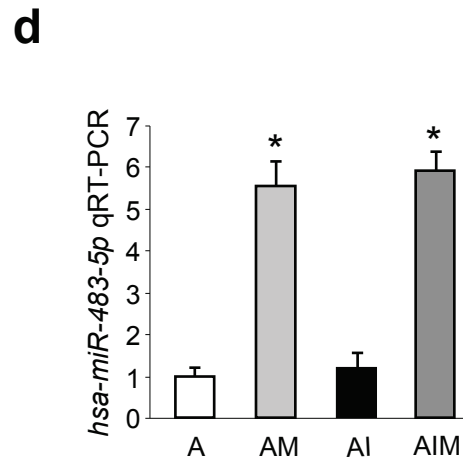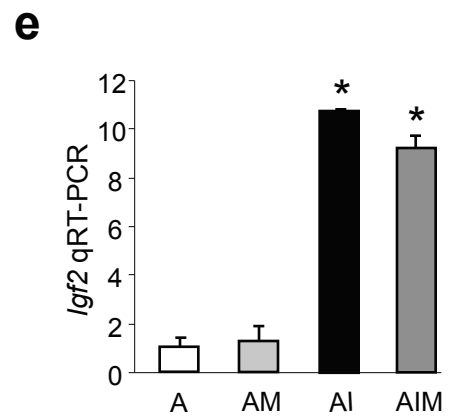

**Supplementary Figure 9. Additional characterization of *miR-483* and *Igf2* gene manipulation in primary colon organoids.**

**(a)** Additional biological replicates of *Apc*-null (“A”) versus AI, AM, and AIM colon organoids. All images are culture day 50 after retroviral infection. Each image indicates a representative region from an individual experiment.

**(b)** *MiR-483*-containing modules AM and AIM induce epithelial dysplasia in adult colon organoids, day 50, E-cadherin immunofluorescence.

**(c)** Infection of *Apc*-null colon organoids by *miR-483/GFP* lentivirus. Fluorescence microscopy at 7-10 days post-infection revealed re-formation of organoids containing epithelial GFP signal.

**(d, e).** (d) *hsa-miR-483-5p* and (e) *Igf2* qRT-PCR in *Apc*-null colon organoids infected by *miR-483/GFP* lentivirus. FACS sorting was performed on *Apc*-null colon organoids at 14 days post-infection with *miR-483/GFP* and/or *Igf2-IRES-GFP* viruses to isolate RNA from EpCAM<sup>+</sup>GFP<sup>+</sup> cells (i.e. transduced colon epithelium) followed by stem-loop qRT-PCR for *hsa-miR-483-5p* or qRT-PCR for *Igf2*. Note appropriate overexpression of *miR-483* and/or *Igf2*. Also, *miR-483* overexpression did not significantly alter *Igf2* expression and vice-versa. n=3, Mean +/- SE. P value: \*: P < 0.01

# Supplementary Figure 10

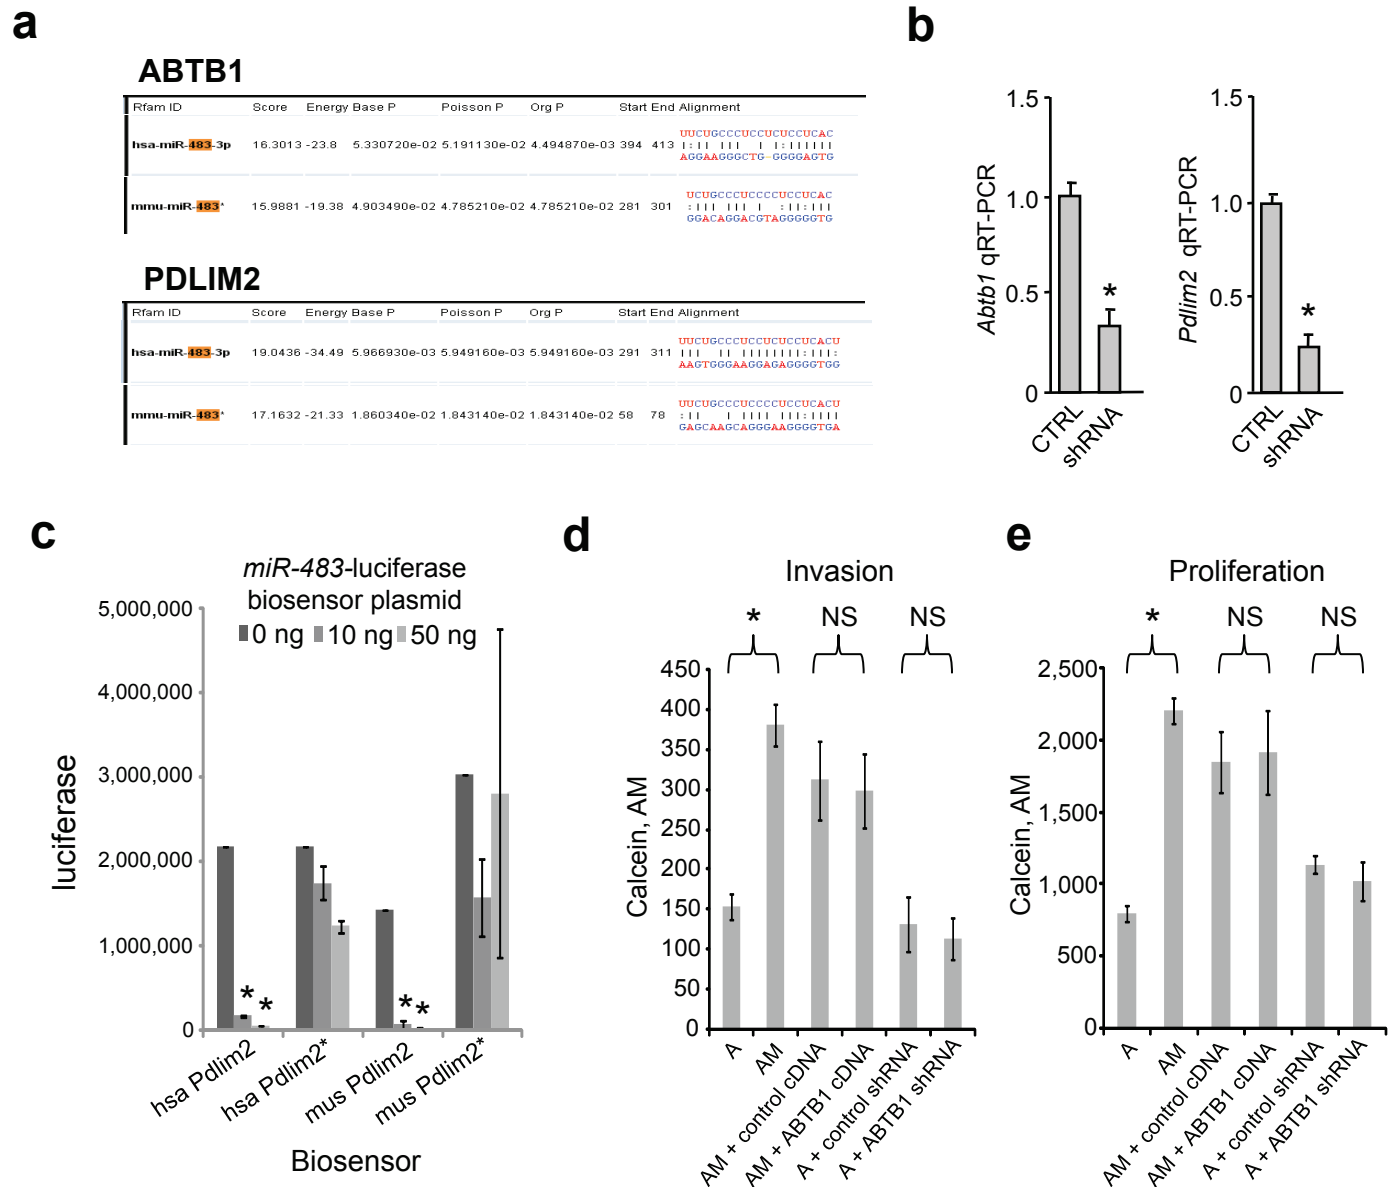

## Supplementary Figure 10. *miR-483* suppression of *Abtb1* and *Pdlim2*.

(a) *Abtb1* and *Pdlim2* exhibit significant inverse correlation with *miR-483* amplification by analysis of colorectal patient data (COAD) from The Cancer Genome Atlas (TCGA) and MicroCosm. Sequences of human (Hsa) and mouse (Mmu) *miR-483* and corresponding 3' UTR binding sites for *Mmu/Hsa-miR-483* are conserved in *Abtb1* and *Pdlim2*.

(b) Validation of *Abtb1* and *Pdlim2* suppression by *miR-483*. *Abtb1* and *Pdlim2* RNA from HEK293T cells 5 days after infection with lentivirus encoding *ABTB1* or *PDLIM2* shRNA or negative control shRNA. n=3 experiments, mean +/- SE, \* = P<0.05.

(c) Biosensor assay. *miR-483* represses 3' UTR-luciferase reporters with wild type (mus *Pdlim2* and hsa *Pdlim2*) but not mutant (mus *Pdlim2*\* and hsa *Pdlim2*\*) *miR-483* binding sites. Renilla luciferase was normalized to firefly luciferase. 0 ng, 10 ng and 50 ng of *miR-483* expression plasmid were transfected into 293T cells. n=4, mean +/- SE. \* = P < 0.05.

(d) *ABTB1* does not mediate *miR-483*-dependent invasion and proliferation. AM vs A modules were assayed for invasion and proliferation with lentiviral delivery of *ABTB1* overexpression or shRNA knockdown.

## Supplementary Figure 11

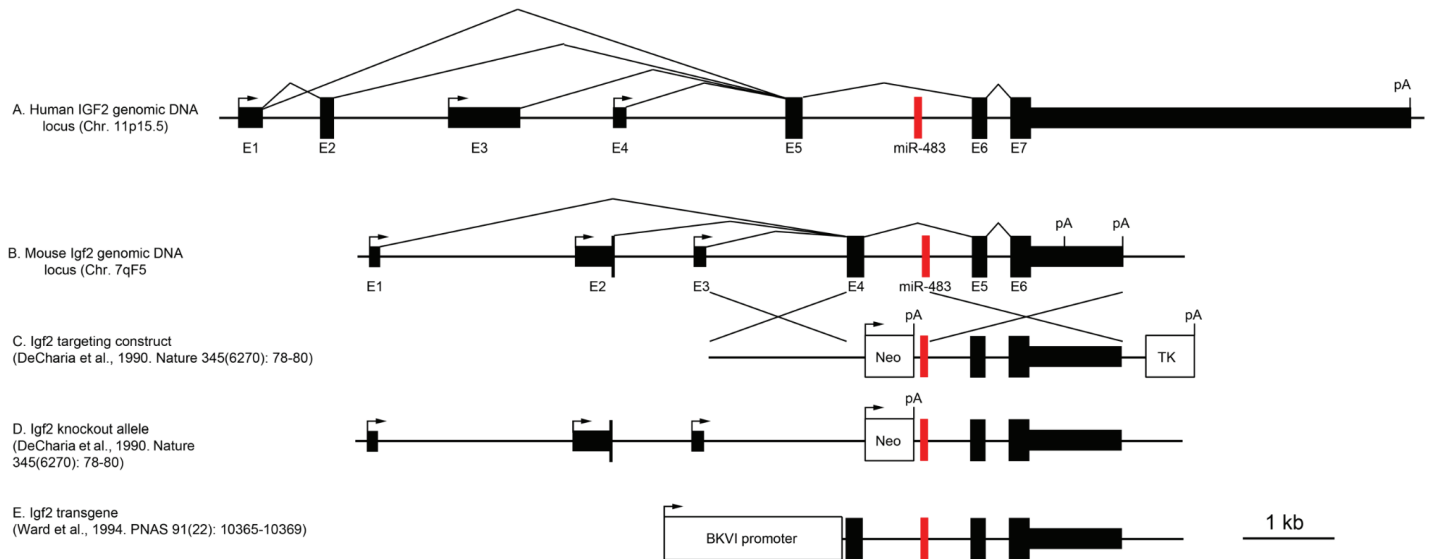

**Supplementary Figure 11. Spatial relationship between *Igf2* and *miR-483* (red rectangle) within *Igf2* intronic sequences and previously described *Igf2* knockout and transgenic overexpressing cassettes.**

**(a)** Organization of the human *IGF2* genomic locus on 11p15.5 with intronic *miR-483*.

**(b)** Organization of the mouse *Igf2* genomic locus on 7p with *miR-483* in intron 4.

**(c, d)** Schematic of the *Igf2* targeting construct (c) and recombined locus (d) used to generate an *Igf2* ko mouse (De Charia et al., 1990, Nature 345(6270): 78-80) that was used to determine effects on *Apc*-mediated tumorigenesis (Hassan et al., Cancer Res. 60, 1070-1076 (2000)). Note the presence of a *NeoR*/polyA cassette upstream of *miR-483* in mouse intron 4.

**(e)** Schematic of the *Igf2* transgenic construct used to generate an *Igf2* overexpressing mouse (Ward et al., PNAS 91(22): 10365-10369) that was used to determine synergy with *Apc*-mediated tumorigenesis (Hassan et al., Cancer Res. 60, 1070-1076 (2000)). The insert is an *Igf2* minigene containing intronic *miR-483* in mouse intron 4.



## SUPPLEMENTARY DISCUSSION

Interestingly, prior studies demonstrating *Igf2/Apc* cooperation during murine polyposis<sup>1</sup> utilized a transgenic *Igf2* minigene containing *miR-483* in intron 4. Conversely, *Igf2* knockout mice used for *Apc* cooperativity studies contained neoR/polyA cassettes upstream of *miR-483* that likely disrupt *miR-483* expression<sup>2,3</sup> (**Supplementary Fig. 11**). The alteration of *miR-483* expression in *Igf2* knockout mice has also been predicted by bioinformatic analysis of mouse knockouts of genes with intronic miRNAs<sup>4</sup>. A floxed *Igf2* allele that cooperates with *p53* loss deletes *Igf2* exons 4-6 including *miR-483*<sup>5</sup>. This intimate relationship between *Igf2* and *miR-483* may illustrate a general principle of inadvertent miRNA manipulation in knockout/transgenic mice<sup>4</sup>, analogous to angiogenic phenotypes of the *Egfl7* locus being in fact attributable to *miR-126* contained within *Egfl7* intron 7<sup>6</sup>. Further, the possible contribution of intronic *miR-483* to *Igf2* locus imprinting-based effects on CRC<sup>7</sup> merits investigation, as suggested by *miR-483/Igf2* cooperation in organoid culture.

The pro-apoptotic gene *Puma/Bbc3*, and additional CRC tumor suppressor genes *Smad4* and *Socs3* have been suggested to mediate *miR-483*-dependent effects in HCT116 cells, pancreatic and hepatocellular carcinoma cell lines respectively<sup>8-11</sup>. However, since in contrast to *PDLIM2* these targets are not repressed in *miR-483*-amplified cancers in the TCGA COAD/READ datasets, *PDLIM2* appears a more plausible *miR-483* target for human CRC. Furthermore *PDLIM2* undergoes homozygous deletion in human CRC (6% frequency; [www.cbioportal.org](http://www.cbioportal.org)<sup>12</sup>) and is hypermethylated in CRC cell lines<sup>13</sup>.

1. Hassan, A.B. & Howell, J.A. Insulin-like growth factor II supply modifies growth of intestinal adenoma in *Apc*(Min/+) mice. *Cancer Res* **60**, 1070-1076 (2000).
2. Ward, A., Bates, P., Fisher, R., Richardson, L. & Graham, C.F. Disproportionate growth in mice with *Igf-2* transgenes. *Proc Natl Acad Sci U S A* **91**, 10365-10369 (1994).
3. DeChiara, T.M., Efstratiadis, A. & Robertson, E.J. A growth-deficiency phenotype in heterozygous mice carrying an insulin-like growth factor II gene disrupted by targeting. *Nature* **345**, 78-80 (1990).

4. Osokine, I., Hsu, R., Loeb, G.B. & McManus, M.T. Unintentional miRNA ablation is a risk factor in gene knockout studies: a short report. *PLoS Genet* **4**, e34 (2008).
5. Haley, V.L., *et al.* Igf2 pathway dependency of the Trp53 developmental and tumour phenotypes. *EMBO Mol Med* **4**, 705-718 (2012).
6. Kuhnert, F., *et al.* Attribution of vascular phenotypes of the murine Eglf7 locus to the microRNA miR-126. *Development* **135**, 3989-3993 (2008).
7. Timp, W., Levchenko, A. & Feinberg, A.P. A new link between epigenetic progenitor lesions in cancer and the dynamics of signal transduction. *Cell Cycle* **8**, 383-390 (2009).
8. Veronese, A., *et al.* Oncogenic role of miR-483-3p at the IGF2/483 locus. *Cancer Res* **70**, 3140-3149 (2010).
9. Hao, J., Zhang, S., Zhou, Y., Hu, X. & Shao, C. MicroRNA 483-3p suppresses the expression of DPC4/Smad4 in pancreatic cancer. *FEBS Lett* **585**, 207-213 (2011).
10. Ma, N., *et al.* Igf2-derived intronic miR-483 promotes mouse hepatocellular carcinoma cell proliferation. *Mol Cell Biochem* **361**, 337-343 (2012).
11. Rigby, R.J., Simmons, J.G., Greenhalgh, C.J., Alexander, W.S. & Lund, P.K. Suppressor of cytokine signaling 3 (SOCS3) limits damage-induced crypt hyperproliferation and inflammation-associated tumorigenesis in the colon. *Oncogene* **26**, 4833-4841 (2007).
12. Cerami, E., *et al.* The cBio cancer genomics portal: an open platform for exploring multidimensional cancer genomics data. *Cancer Discov* **2**, 401-404 (2012).
13. Qu, Z., *et al.* DNA methylation-dependent repression of PDZ-LIM domain-containing protein 2 in colon cancer and its role as a potential therapeutic target. *Cancer Res* **70**, 1766-1772 (2010).
